# Supplementary material
Source: publisher figshare collection journal article supplement (https://acs.figshare.com/ndownloader/files/3766708)
Supplement: Supplementary file 1 [file 3766708]

Biodegradation and Toxicity of Protease/Redox/pH  
Stimuli-Responsive PEGlated PMAA Nanohydrogels for  
Targeting Drug delivery

*Sha Jin<sup>†</sup>, Jiaxun Wan<sup>†</sup>, Lizheng Meng<sup>§</sup>, Xiaoxing Huang<sup>§</sup>, Jia Guo<sup>†</sup>, Li Liu<sup>§</sup>,*

*Changchun Wang<sup>†,\*</sup>*

<sup>†</sup> State Key Laboratory of Molecular Engineering of Polymers, and Department of Macromolecular Science, Laboratory of Advanced Materials, Fudan University, Shanghai 200433, China.

<sup>§</sup> Shanghai Institute of Pharmaceutical Industry, Shanghai 200000, China.

\*Address correspondence to [ccwang@fudan.edu.cn](mailto:ccwang@fudan.edu.cn)

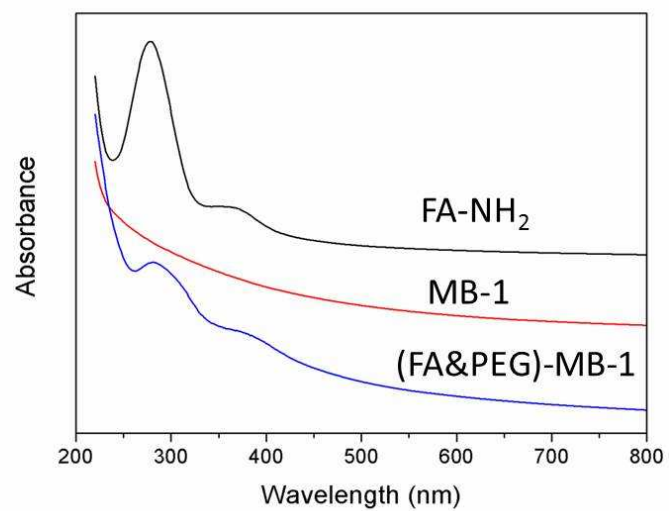

**Figure S1.** UV-vis spectra of PMAA nanohydrogels before and after modification with FA and PEG.

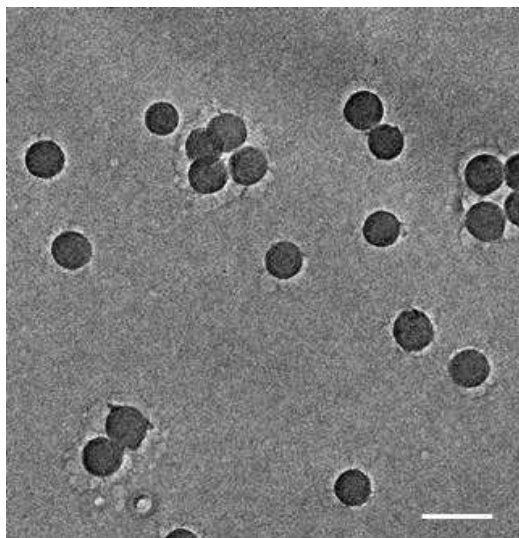

**Figure S2.** TEM image of PMAA nanohydrogels after modification with FA and PEG.

The scale bar is 500nm

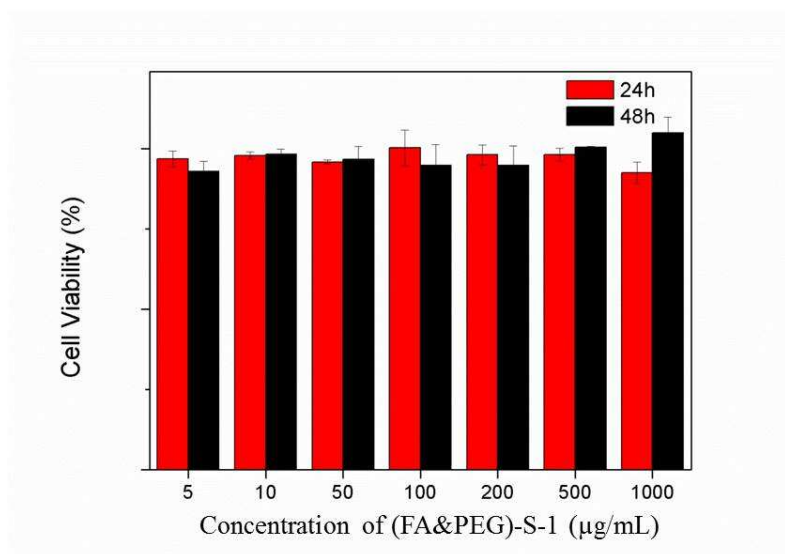

**Figure S3.** In vitro cell viability of HEK 293T cells incubated with pure (FA&PEG)-MB-1 at different concentrations for 24 h and 48 h.
